1 Community mobilisation approaches to preventing and reducing  
2 adolescent multiple risk behaviour: a realist review protocol

3 Tinner, Laura. [laura.tinner@bristol.ac.uk](mailto:laura.tinner@bristol.ac.uk) (corresponding author).<sup>1</sup>

4 Caldwell, Deborah. [d.m.caldwell@bristol.ac.uk](mailto:d.m.caldwell@bristol.ac.uk)<sup>1</sup>

5 Campbell, Rona. [rona.campbell@bristol.ac.uk](mailto:rona.campbell@bristol.ac.uk)<sup>1</sup>

6

7 <sup>1</sup>Population Health Sciences, Bristol Medical School, Canynge Hall, University of Bristol,  
8 Bristol, UK, BS8 2PL.

9

10

11

12

13

14

15

16

17

18

19

20

21

22

23

24

25

26

27

28

29

30

31

32

33

34

35

36

37

38

39

40

41

42

43

NOTE: This preprint reports new research that has not been certified by peer review and should not be used to guide clinical practice.

44

45 [Abstract](#)

46

47 **Background:** Adolescent multiple risk behaviour (MRB) continues to be a global health issue,  
48 contributing to the burden of non-communicable diseases. Most interventions have focused  
49 on the proximal causes of adolescent MRB such as peer or family influence, rather than  
50 targeting the wider environmental or structural context. There is increasing recognition that  
51 community mobilisation approaches that extend beyond individually-focused educational  
52 programmes could be beneficial for adolescent health. Despite this, there are gaps in the  
53 current literature, theory and implementation that would benefit from a realist approach due  
54 to the suitability of this methodology to analysing complex interventions. In this protocol, we  
55 outline our study that aims to understand ‘how, why, for whom and in what circumstances  
56 and time periods do community mobilisation interventions work to prevent and/or reduce  
57 adolescent multiple risk behaviour?’

58

59 **Methods:** A realist review was chosen as the most suitable review method as it is theory-  
60 driven and seeks to understand how, why and for whom interventions work to produce  
61 intended and unintended outcomes. A six-stage iterative process is outlined, which includes  
62 initial development of a programme theory, systematic searching, study selection and  
63 appraisal, data extraction and data synthesis. We will engage with stakeholders at different  
64 stages in this process to aid the development of the programme theory.

65

66 **Discussion:** The goal of this realist review is to identify and refine a programme theory for  
67 community mobilisation approaches to the prevention and/or reduction of adolescent  
68 multiple risk behaviour. Our aim is that the findings surrounding the programme theory

69 refinement can be used to develop and implement adolescent multiple risk behaviour  
70 interventions and maintain collaboration between local policy makers, researchers and  
71 community members.

72

73 **Registration:** This realist review is registered on the PROSPERO database (registration  
74 number: CRD42020205342).

75

76 **Keywords:** Community mobilisation; adolescence; risk behaviour; realist review; complex  
77 interventions; inequalities.

78

79

80

81

82

83

84

85

86

87

88

89

90

## 91 Background

### 92 Adolescent health risk behaviours

93 Health risk behaviours such as tobacco smoking, hazardous alcohol consumption, antisocial  
94 behaviour, physical inactivity and unprotected sexual intercourse are global health issues,  
95 which are commonly initiated and become habitual in adolescence (1, 2). Adolescents who  
96 engage in one risk behaviour are likely to engage in others (3, 4), leading to increased public  
97 health interest in multiple risk behaviour (MRB), which refers to the occurrence of two or  
98 more risk behaviours directly or indirectly related to health (5, 6). MRB has been found to be  
99 associated with a number of adverse health and social outcomes such as poor educational  
100 attainment (7), obesity, depression and anxiety in adulthood (8), cancers and premature  
101 mortality (7, 9). This has, in turn, led to public health interventions that address multiple as  
102 opposed to single behaviours (10).

103

104 Most interventions addressing adolescent MRB have focused on the proximal causes such as  
105 peer or family influence, rather than targeting the wider environmental, social or structural  
106 context (11). For instance, two Cochrane systematic reviews have assessed the impact of  
107 individual, family and school-level interventions on adolescent multiple risk behaviour (10,  
108 12). One of those reviews found mixed evidence, concluding that school-based universal  
109 interventions are potentially effective in 'preventing engagement in tobacco use, alcohol use,  
110 illicit drug use, and antisocial behaviour, and in improving physical activity among young  
111 people, but not in preventing other risk behaviours' (12). The authors highlighted that there  
112 was no strong evidence of benefit for family-level or individual-level interventions across the  
113 risk behaviour outcomes investigated (12). The interventions included in this review were  
114 predominantly educational programmes. The effectiveness and equity of these

115 “downstream” interventions has been questioned (13) because health risk behaviours rarely  
116 have a single cause and occur in complex socio-cultural contexts (14). As such, there is  
117 increasing recognition that structural changes that extend beyond individually-focused  
118 educational programmes could be beneficial for adolescent health (14, 15).

119

## 120 [Community mobilisation interventions](#)

121 Recognition that decisions about health risk behaviours are made within a broad social  
122 context has led to the development and implementation of community-engagement  
123 interventions (16). There is an extensive range of types of community-engagement public  
124 health interventions, varying in the extent to which they emphasise community involvement  
125 in determining and delivering the programmes (16). ‘Community mobilisation’ interventions  
126 are one such type that work to engage community members to ‘take action towards achieving  
127 a common goal’ (17) and have gained traction as a strategy for addressing complex and  
128 multifaceted problems (18). Community mobilisation is a collaborative public health effort  
129 that is defined by the inclusion of a community coalition made up of diverse stakeholders  
130 (such as schools, businesses, residents, youth groups, emergency services and religious  
131 leaders) (11). These stakeholders critically analyse the root causes of local problems, identify  
132 an array of potential solutions, develop multi-sector partnerships, and implement multi-  
133 component strategies for creating local change and more health-promoting environments  
134 (14).

135

136 Community mobilisation efforts explicitly seek to affect community-level influences through  
137 changes of policies, practices, organisations and other features of the social or physical  
138 environment that may impact on the health outcome or behaviour (19), signifying a shift away

139 from individual behaviour change to a focus on the social determinants of health (20).  
140 However, these approaches may still include components which address individual  
141 behaviours (e.g. health promotion programmes within schools), but they seek to combine  
142 these with other structural factors as part of a package of measures that are chosen and  
143 monitored from community stakeholders.

144

145 There is systematic review evidence suggesting that higher levels of community involvement  
146 within an public health intervention is linked to more beneficial effects and positive trends  
147 across a range of outcomes (21). There is also some evidence to support the role of  
148 community mobilisation efforts in preventing health risk behaviours. For instance, such  
149 interventions have resulted in reductions in high risk alcohol consumption and alcohol-related  
150 injuries (22); alcohol impaired driving (23); uptake of smoking in young people (16) and youth  
151 violence (24). Researchers have highlighted that with adequate resources and training,  
152 support from within the community and adoption of evidence-based strategies, community  
153 mobilisation approaches have promise as an effective vehicle for addressing adolescent  
154 multiple risk behaviour (19). Further, community-mobilisation efforts are also thought to be  
155 well suited to achieving health equity (25), due to ‘shared decision making’ (26) and the  
156 incorporation of ‘upstream’ or structural elements (27), but this has yet to be explored in  
157 relation to adolescent multiple risk behaviour interventions.

158

159 There are also significant challenges in implementing and evaluating such approaches, which  
160 is unsurprising given the dynamic set of social interactions and relational complexity one  
161 might expect in community-centred interventions (28). These implementation challenges  
162 include lack of community interest and long-term engagement, design inadequacies, inflated

163 expectations, and weakness in planning and implementation of the interventions (19, 29, 30).  
164 Tensions and different expectations between scientists and community members as well as  
165 the practical difficulty in managing multiple components and stakeholder interests have also  
166 been cited as issues (11).

167

168 Evaluation is equally challenging (31), which is reflected in the lack of empirical evaluations  
169 of structural interventions such as community mobilisation compared to those focused at the  
170 individual level (14). There is uncertainty around how long it might take to see an impact on  
171 behaviours, although it is expected to be a lengthy process. Even if effects are identified, the  
172 chain linking any changes in health risk behaviours to the mobilisation efforts is so long and  
173 complex that causal attributions become complicated (14). The challenges in evaluating and  
174 implementing community mobilisation interventions has meant they are often evaluated  
175 through methods such as quasi-experimental studies in addition to randomised controlled  
176 trials (RCTs), meaning that they have been missing from systematic reviews such as the  
177 aforementioned adolescent MRB review (12). Consequently, the evidence base for  
178 community mobilisation efforts is mixed in terms of producing desirable outcomes on a  
179 community and individual level.

180

181 We aim to address the gap in the literature through investigating community mobilisation  
182 interventions aimed at preventing and/or reducing adolescent multiple risk behaviour. There  
183 is a strong rationale for an alternative review approach that speaks to the complexities and  
184 challenges surrounding the delivery and evaluation of community mobilisation efforts.  
185 Further, we are concerned with moving beyond assessing effectiveness of public health  
186 interventions to synthesise existing knowledge and articulate *how* community mobilisation

187 interventions work for adolescent health. Therefore, a realist review was chosen as the most  
188 appropriate methodological approach. Realist reviews are theory-driven approaches to  
189 evidence synthesis, incorporating diverse data sources to provide insight into the underlying  
190 mechanisms and contexts in which the interventions work (32). Realist reviews are ideal for  
191 examining social interventions, particularly those in community settings as it is recognised  
192 that programmes are rarely delivered in the same way or have exactly the same outcomes,  
193 due to contextual factors that can never be fully controlled (33).

194

195 Realist inquiry is thus ‘increasingly recognised as an effective process for consolidating  
196 evidence and learning from complex social processes and interventions’ (34), with successes  
197 in public health and community development (35, 36). Therefore, our realist review aims to  
198 contribute to the current adolescent multiple risk behaviour evidence base, which has largely  
199 focused on effectiveness of interventions through traditional systematic reviews. Further  
200 support for our intended approach comes from a recent PhD thesis which used an adapted  
201 realist approach to assessing adolescent multiple risk behaviour programmes, combining  
202 realist evaluation with primary data collection (37) (38). The authors did not specifically focus  
203 on community mobilisation as an intervention and included fewer health risk behaviours than  
204 we do here. This protocol describes our realist methodological approach and intended  
205 procedures in the sections that follow.

206

207 This realist systematic review is registered on the PROSPERO database (registration number:  
208 CRD42020205342). A PRISMA-P check list is included as a supplementary file.

209



## 210 [Methods](#)

### 211 [Review aim](#)

212 Our aim is to use a theory-driven evidence synthesis to assess how and why community  
213 mobilisation interventions work/do not work to prevent or reduce adolescent multiple risk  
214 behaviour and in what contexts. We are additionally interested in the question of ‘who’ these  
215 interventions work for, in order to understand the impact of these types of interventions  
216 upon existing health inequalities through investigating whether the interventions are  
217 beneficial to disadvantaged communities. Although the focus of the review is adolescent  
218 multiple risk behaviour, we may draw on wider literature to understand the goals of  
219 community mobilisation approaches and the mechanisms by which it is hoped these are  
220 achieved. An additional objective of our review is to develop transferable learning about  
221 community mobilisation approaches in public health research and adolescent health  
222 interventions. The realist review will be guided by the following sub-questions:

- 223 1. What are the outcomes of community mobilisation interventions targeting adolescent  
224 multiple risk behaviour?
- 225 2. What are the mechanisms, acting at the individual, community and societal levels  
226 through which community mobilisation interventions produce outcomes?
- 227 3. What are the key contextual influences that determine whether the mechanisms  
228 produce both intended and unintended outcomes?

229

### 230 [Realist review methodology](#)

231

232 Realist review methodology is a theory-driven, interpretive approach to evidence synthesis  
233 (38) developed by the work of Pawson et al (39-41). It has gained increasing popularity in  
234 addressing the challenge of ‘what works, for whom, under what circumstances and in what

235 time period’ and is considered especially salient when data are complex, multi-layered and  
236 there is a need to understand complex relationships, interdependence, and mechanisms (42).  
237 A core component of realist reviews is to develop ‘middle-range realist programme theory’  
238 (43) that explains how an intervention ‘works’ within what contexts. Realist reviews allow for  
239 exploration of complex topics and the inclusion of a wide body of quantitative, qualitative  
240 and mixed methods evidence to develop and refine theory (38). Therefore, it is suited to  
241 multi-component community-based interventions, for which evaluations may include a range  
242 of different data and be published in grey literature.

243

244 Realist reviewers view ‘causation’ as generative, which means that the manifested world is  
245 generated (i.e. caused) via underpinning mechanisms (32). They identify where an  
246 intervention, under certain contextual conditions (C), triggers a mechanism (M) to achieve a  
247 given outcome (O) (38). This CMO configuration is central to analysis and theory  
248 development, viewing mechanisms as the integral link between contexts and outcomes. The  
249 aim of realist review methodology to move beyond measuring effectiveness of interventions,  
250 toward explanation of how and why an intervention works is a key strength that separates it  
251 from traditional systematic reviews. Dalkin et al (44) conceptualise a mechanism as a resource  
252 or reasoning, which triggers an outcome, but may only be active in certain contexts. Under  
253 certain contextual conditions, the mechanisms are triggered, while in others they ‘fire’ to a  
254 lesser degree or not at all (44). Realist review methodology is highly applicable to complex  
255 public health interventions and is an approach that can build ‘common ground’ between  
256 researchers and policy makers through providing accessible recommendations on how  
257 interventions might be delivered in different contexts (41).

258

259 We have conceptualised multi-component community mobilisation approaches as complex  
260 interventions in which outcomes and mechanisms will be context sensitive (39). Therefore,  
261 the realist review approach will allow us to investigate in what contexts community  
262 mobilisation interventions are effective. This realist review will follow the practice guidelines  
263 outlined by the Realist and Meta-narrative Evidence Synthesis: Evolving Standards (RAMESES)  
264 framework (40, 41).

## 265 266 Study design

267 This review is structured around the five review stages outlined by Pawson et al (39) and has  
268 been informed by other realist review protocols in the field (38, 45). Figure 1 is a diagram of  
269 the review process adapted from Power et al (38).

270  
271 *Figure 1 to go here.*

272 *Figure 1: Summary of stages of realist review adapted from Power et al (38). This depicts the*  
273 *steps for developing the initial programme theory, searching for evidence and synthesising*  
274 *the data with the input of key stakeholders. Retroduction refers to inferences made through*  
275 *interpreting the data about the underlying causal mechanisms.*

## 276 277 Stages of realist review 278 (1) Locating existing theories

279 The first step in a realist review is to conduct scoping searches that begin to identify theories  
280 that might explain how community mobilisation interventions may work to address  
281 adolescent multiple risk behaviour. The search will include academic databases (MEDLINE,  
282 PubMed, Web of Science), UK health websites and grey literature databases (OpenGrey, the  
283 King's Fund, The Health Foundation) as well as Google Scholar. Broad search terms will be

284 used at this initial stage (e.g. “community mobilisation”, “community coalition”, “youth”,  
285 “adolescence”, “health risk behaviour”, “substance use”, “antisocial behaviour”) and back  
286 and forth citation tracking will be utilised until we develop a core set of empirical studies to  
287 help build the initial programme theory framework (40). This initial search is not designed to  
288 be exhaustive: this stage in the theory development is expected to be a ‘rough starting point’  
289 that will be refined throughout the realist review process (43).

290

291 It is advisable to include the expertise of those delivering or evaluating the interventions. At  
292 this stage we will engage with key stakeholders identified through the literature to provide  
293 guidance on the development of the programme theory. For example, they may provide  
294 insight into the different contexts and mechanisms that impact on adolescent risk behaviour  
295 outcomes from their experience in the field. These stakeholders may also highlight other  
296 relevant studies or individuals we should engage with to further develop the programme  
297 theory. When we have developed an initial programme theory, we will move onto stage 2  
298 and the more structured and systematic searching.

299

## 300 (2) Search strategy

301

302 In Stage 2 we will conduct more formal searches, which will be informed by the initial  
303 programme theory development in stage 1. The objective in this stage will be to identify  
304 literature and evidence capable of informing the refinement of a more detailed programme  
305 theory (45). We will develop search terms from the initial background search in Stage 1 and  
306 discussions with a subject librarian, leading to systematic searches being undertaken to  
307 collect evidence to refine the programme theory. We will include the following databases:

308 PubMed; MEDLINE; PsycINFO; Web of Science; CINAHL; Sociological Abstracts. Grey literature  
309 will also be searched on OpenGrey and on external expert organisations and charity websites.  
310 ProQuest will be searched for unpublished theses and dissertations. Google Scholar will be  
311 used for citation searching as well as reference lists of relevant papers.

312

313 Search terminology and syntax will be informed by the initial programme theory  
314 identification, known literature and collaboration between the research team and a subject  
315 librarian. We will draw on the search terms used in previous systematic reviews on individual-  
316 level adolescent multiple risk behaviour interventions. Search terms will include MeSH terms  
317 and free text related to “community mobilisation”, “adolescence” and a range of multiple  
318 health risk behaviours. No date restrictions will be used and only studies in the English  
319 Language will be assessed for eligibility.

320

321 While formalised and systematic, the sampling approach in realist reviews remains purposive  
322 to answer specific questions and develop theories (39). Therefore, the process will likely be  
323 iterative and need to be repeated (39), with back and forth citation tracking remaining a key  
324 part of the iterative search strategy (46). Corresponding authors of selected articles may also  
325 be contacted for further examples that may be relevant to the question. The search terms  
326 and strategies will be documented in a log-book as the review progresses.

327

### 328 (3) Study selection

329 We will use the following inclusion criteria to determine if a document is likely to contribute  
330 to the programme theory development:

- 331       • Type of intervention: Community mobilisation must form a core part of the  
332       intervention, most commonly identified by the development of a community coalition  
333       group involving a diverse range of community stakeholders as identified above. In  
334       many cases, the community coalition will select intervention components from a  
335       ‘menu’ of strategies and adapt them to fit local needs. As mentioned, although these  
336       types of interventions derive from the desire to move away from individual behaviour  
337       change, they are also likely to include a range of “upstream” and “downstream”  
338       components, which may include education delivery. The key criterion remains that  
339       the intervention should include community mobilisation at its core, and should  
340       include at least two components (e.g. an educational programme and local policy  
341       enforcement).
- 342       • A range of document types, study designs and data types may be relevant to the  
343       development of the initial programme theory. All intervention evaluation study  
344       designs and data types, from all time periods, may be included in the review to test  
345       and refine the programme theory (e.g. randomised controlled trials (RCTs), quasi-  
346       experimental studies, case studies).
- 347       • Participants: the community mobilisation efforts should be targeted (at least  
348       predominately) at young people age 10-19 years, although this age range remains  
349       flexible<sup>1</sup>. Adult stakeholders (such as parents, community members, school staff) will  
350       likely be included in the community coalition but should not be the focus of the  
351       intervention. All sampling decisions will be transparently reported.

---

<sup>1</sup> For instance, a ‘pre-teen’ intervention targeting children age 9-12 would be included as the population are only one year out of our pre-specified age range of 10-19 years. However, an older adolescent/young adult intervention targeting individuals aged 18-25 would not be included as only two years (18 and 19) of the eight year range addressed by the intervention falls within our age banding.

- 352       • Aim of intervention: the intervention should have a primary focus on prevention and  
353       reduction of adolescent multiple risk behaviour and include at least two health risk  
354       behaviours from a wide range including: regular tobacco smoking; regular alcohol  
355       drinking; binge drinking (alcohol); cannabis use; recent or regular illicit drug use; risky  
356       sexual behaviours; anti-social behaviour and offending; vehicle-related risk  
357       behaviours (e.g. cycling without a helmet; not using a car seatbelt, joy riding); self-  
358       harm; gambling; unhealthy diet; and physical inactivity.
- 359       • Outcome measures: Primary outcomes of interest include reduction and/or  
360       prevention of the wide range of multiple risk behaviours mentioned above. A range of  
361       additional medium- and long-term outcomes within health and social domains are  
362       expected given the number of health risk behaviours the interventions can cover as  
363       well as the multi-component nature of these types of interventions. Secondary  
364       outcomes of interest in this review include: Education and employment: educational  
365       qualifications; truancy and school exclusion; employment; not being in education,  
366       employment or training (NEET); Crime: Criminal record/offending; long-term addictive  
367       behaviours; Gambling; Teenage pregnancy or parenthood; Sexually transmitted  
368       infections; Injuries; Morbidity (e.g. Hepatitis C, HIV, anxiety and depression, obesity,  
369       type II diabetes, fatty liver disease, liver cirrhosis); Suicide/self-harm; and Premature  
370       mortality. Realist reviews are interested in intended and unintended outcomes  
371       related to the context, mechanism, and outcomes of the intervention therefore other  
372       unknown outcomes may become relevant to the programme theory development.
- 373
- 374       Studies will be excluded if they relate to any of the following:

- 375       • A single component intervention (such as an educational programme) that is delivered  
376       in the community but does not incorporate community mobilisation as we have  
377       defined it.
- 378       • Interventions targeted at participants outside of the age range. Some interventions  
379       may include other populations, but youth should be the primary focus.
- 380       • Interventions aimed at preventing and reducing a single adolescent health risk  
381       behaviour (e.g. alcohol misuse).
- 382       • Clinical and pharmaceutical interventions including ‘community outreach’ services  
383       such as the provision of mobile clinics.
- 384       • Studies not described in the English language.

385

386 We will use Raayan (QCRI) software for screening and management of the studies at this stage  
387 in the review. The RAMESES guidelines will be used to appraise the studies (41). The selection  
388 of evidence will be made based on judgements around their *relevance* (contribution to the  
389 programme theory development and refinement) and *rigour* (credibility and trustworthiness  
390 of methods) (45, 47). Any exclusions based on these appraisals will be documented.

391

#### 392 (4) Data extraction

393 Study characteristics will be extracted into a table to provide a descriptive overview of the  
394 types of community mobilisation interventions included, based on a ‘bespoke’ set of data  
395 extraction forms informed by the relevant literature (39). Realist reviews are structured  
396 through Context-Mechanisms-Outcome (CMO), comparable to PICO for traditional  
397 systematic reviews (42). Context, mechanisms and outcomes are extracted during the realist



398 review and can be conceptualised as the ‘data’ that support evidence to support, reject or  
399 refine the programme theory (33). However, this process is not as rigid as with traditional  
400 systematic reviews and different sources may provide different information that contributes  
401 to the programme theory development. We will extract the following information:

- 402 • Study details: authors, year of publication, country of intervention delivery, study  
403 aims, study design, participant characteristics, quality appraisal.
- 404 • Context: background of the intervention, aims of the intervention, type of  
405 intervention, setting (e.g. type and size of community), age range, number of  
406 components, policy context for the area, historical context.
- 407 • Mechanism: descriptions of the processes through which the intervention influenced  
408 outcomes, who the intervention worked for and who it did not, author-identified  
409 mechanisms.
- 410 • Outcomes: adolescent multiple health risk behaviour outcomes but also a range of  
411 health and social outcomes mentioned previously.
- 412 • Additional study information and researcher comments.

413

414 The above is not an exhaustive list and information on the mechanisms and context will be  
415 expected to change through experience with the studies and input from expert stakeholders.  
416 Any disagreements on extracted data will be resolved through discussion with the research  
417 team. Realist reviews assimilate information more through note taking and documents are  
418 scoured for ideas about how the intervention might work (39). To approach the more complex  
419 and iterative process of examining study sources, we will follow the guidance from Pawson  
420 et al (39) and will also upload the documents to NVivo for organising and coding to aid  
421 development of the programme theory and to keep a record of our procedures (45).

422

423 (5) Data synthesis

424 The goal of data synthesis in a realist review is to consolidate the data from the previous steps  
425 to refine the initial programme theory (45). Analysis will involve interpretation of the  
426 researchers and judgement of the data. Coding the data will involve deductive (informed by  
427 the initial programme theory), inductive (emerging from the data within the identified  
428 interventions) and retroductive approaches (inferences made through interpreting the data  
429 about the underlying causal mechanisms) (45). These approaches will guide the review to  
430 interpret and explain the findings and outline the contextual conditions and mechanisms that  
431 may need to be present for outcomes to occur. Data to inform our interpretation of the  
432 relationships between the contexts, mechanisms and outcomes will be analysed within and  
433 across the documents. For example, mechanisms inferred from one document will be applied  
434 to other documents to test if they can explain the way contexts influence outcomes in another  
435 intervention (45). This interpretive process will lead to programme theory development of  
436 community mobilisation approaches to preventing and reducing adolescent multiple risk  
437 behaviour.

438

439 (5) Refine programme theories

440 The final product of a realist theory is not a statement of effectiveness, but a refinement of  
441 middle-range theory that answers the questions of what works, for whom, under what  
442 circumstances, in what time period, why and how? (48). Evidence may include primary  
443 outcome data, but also rich description that conveys the contextual elements and  
444 interpretation of the interactions between the context, mechanisms and outcomes by the  
445 researchers (48). Stakeholders involved in stage one will be contacted again, with the  
446 potential for the inclusion of newly identified individuals, for input into the final programme

447 theory(ies). The aim of this process is to confirm that the programme theory makes sense to  
448 those involved, in order to enhance our ability to make practice recommendations from our  
449 findings (39). If needed, we will re-scrutinise elements of the review based on the stakeholder  
450 involvement. We intend to develop a final logic model that will visually present the  
451 programme theory/theories and the relationships between the CMO.

452

## 453 Discussion

454

455 The realist review approach will allow us to explore the relationships between contexts,  
456 mechanisms and outcomes and synthesise evidence surrounding adolescent multiple risk  
457 behaviour interventions that incorporate community mobilisation. We seek to gain a greater  
458 understanding of ‘what works, for whom, in what circumstances, in what time period and  
459 why’, in terms of preventive interventions to improve adolescent health and reduce  
460 inequalities. Our aim is that the findings surrounding the programme theory refinement can  
461 be used to develop and implement adolescent multiple risk behaviour interventions and  
462 maintain collaboration between local policy makers, researchers and community members.  
463 We will recognise any limitations to our study and the realist review approach in the final  
464 synthesis. The dissemination of the findings of this review will follow the RAMESES reporting  
465 guidelines (40, 41).

466

467

468

469

470

471

472

473 [Abbreviations](#)

474 MRB: Multiple risk behaviour

475

476 NEET: not being in education, employment or training

477

478 HIV: human immunodeficiency virus

479

480 RCTs: Randomised Controlled Trials

481

482 CMO: Context, Mechanism, Outcome

483

484 RAMESES: Realist and meta-narrative evidence syntheses: evolving standards

485

486 [Declarations](#)

487 [Ethics approval and consent to participate](#)

488 Not applicable.

489

490 [Consent for publication](#)

491 Not applicable.

492

493 [Availability of data and materials](#)

494 Not application.

495

496 [Competing interests](#)

497 The authors declare no competing interests.

498

499 [Funding](#)

500 This work is funded through LT's post-doctoral post, which is funded by Bristol, North

501 Somerset and South Gloucestershire Clinical Commission Group (CCG) Research Capacity

502 Funding via RC's Senior Investigator Award. The funder had no involvement with the

503 development of the protocol.

504

505 [Authors' contributions](#)

506 LT, DC and RC developed the project idea, chose the realist review approach and developed

507 the inclusion criteria. LT wrote the first draft of the protocol. All authors contributed to writing

508 and refining the protocol and will be involved in the review. LT is the corresponding author.

509 Acknowledgements

510 Not applicable.

511

512

513 References

514

- 515 1. Jackson CA, Henderson M, Frank JW, Haw SJ. An overview of prevention of multiple  
516 risk behaviour in adolescence and young adulthood. *Journal of Public Health*.  
517 2012;34(suppl\_1):i31-i40.
- 518 2. Patton GC, Sawyer SM, Santelli JS, Ross DA, Afifi R, Allen NB, et al. Our future: a  
519 Lancet commission on adolescent health and wellbeing. *The Lancet*. 2016;387(10036):2423-  
520 78.
- 521 3. Kipping RR, Campbell RM, MacArthur GJ, Gunnell DJ, Hickman M. Multiple risk  
522 behaviour in adolescence. *Journal of Public Health*. 2012;34(suppl\_1):i1-i2.
- 523 4. Brooks FM, Magnusson J, Spencer N, Morgan A. Adolescent multiple risk behaviour:  
524 an asset approach to the role of family, school and community. *Journal of Public Health*.  
525 2012;34(suppl\_1):i48-i56.
- 526 5. Hurrelmann K, Richter M. Risk behaviour in adolescence: the relationship between  
527 developmental and health problems. *Journal of Public Health*. 2006;14(1):20-8.
- 528 6. Tinner L, Caldwell D, Hickman M, MacArthur GJ, Gottfredson D, Perez AL, et al.  
529 Examining subgroup effects by socioeconomic status of public health interventions targeting  
530 multiple risk behaviour in adolescence. *BMC Public Health*. 2018;18(1):1180.
- 531 7. Wright C, Kipping R, Hickman M, Campbell R, Heron J. Effect of multiple risk  
532 behaviours in adolescence on educational attainment at age 16 years: a UK birth cohort  
533 study. *BMJ Open*. 2018;8(7):e020182.
- 534 8. Campbell R, Wright C, Hickman M, Kipping RR, Smith M, Pouliou T, et al. Multiple risk  
535 behaviour in adolescence is associated with substantial adverse health and social outcomes  
536 in early adulthood: Findings from a prospective birth cohort study. *Preventive Medicine*.  
537 2020:106157.
- 538 9. Hausdorf K, Eakin E, Whiteman D, Rogers C, Aitken J, Newman B. Prevalence and  
539 correlates of multiple cancer risk behaviors in an Australian population-based survey: results  
540 from the Queensland Cancer Risk Study. *Cancer Causes & Control*. 2008;19(10):1339-47.
- 541 10. Hickman M, Caldwell DM, Busse H, MacArthur G, Faggiano F, Foxcroft DR, et al.  
542 Individual-, family-, and school-level interventions for preventing multiple risk behaviours  
543 relating to alcohol, tobacco and drug use in individuals aged 8 to 25 years. *Cochrane*  
544 *Database of Systematic Reviews*. 2014(11).
- 545 11. Fagan AA, Hawkins JD, Catalano RF. *Interventions For Addiction: Chapter 90.*  
546 *Mobilizing Communities for Alcohol, Drug, and Tobacco Prevention: Elsevier Inc. Chapters;*  
547 2013.
- 548 12. MacArthur G, Caldwell DM, Redmore J, Watkins SH, Kipping R, White J, et al.  
549 Individual-, family-, and school-level interventions targeting multiple risk behaviours in  
550 young people. *Cochrane Database of Systematic Reviews*. 2018(10).
- 551 13. Adams J, Mytton O, White M, Monsivais P. Why are some population interventions  
552 for diet and obesity more equitable and effective than others? The role of individual agency.  
553 *PLoS Medicine*. 2016;13(4).

- 554 14. Miller RL, Janulis PF, Reed SJ, Harper GW, Ellen J, Boyer CB, et al. Creating youth-  
555 supportive communities: outcomes from the Connect-to-Protect® (C2P) structural change  
556 approach to youth HIV prevention. *Journal of Youth and Adolescence*. 2016;45(2):301-15.
- 557 15. Aguirre-Molina M, Gorman DM. Community-based approaches for the prevention of  
558 alcohol, tobacco, and other drug use. *Annual review of public health*. 1996;17(1):337-58.
- 559 16. Carson KV, Brinn MP, Labiszewski NA, Esterman AJ, Chang AB, Smith BJ. Community  
560 interventions for preventing smoking in young people. *Cochrane Database of Systematic  
561 Reviews*. 2011(7).
- 562 17. Lippman SA, Neilands TB, Leslie HH, Maman S, MacPhail C, Twine R, et al.  
563 Development, validation, and performance of a scale to measure community mobilization.  
564 *Social Science & Medicine*. 2016;157:127-37.
- 565 18. Watson-Thompson J, Fawcett SB, Schultz JA. A framework for community  
566 mobilization to promote healthy youth development. *American Journal of Preventive  
567 Medicine*. 2008;34(3):S72-S81.
- 568 19. Flewelling RL, Austin D, Hale K, LaPlante M, Liebig M, Piasecki L, et al. Implementing  
569 research-based substance abuse prevention in communities: Effects of a coalition-based  
570 prevention initiative in Vermont. *Journal of Community Psychology*. 2005;33(3):333-53.
- 571 20. Kim-Ju G, Mark GY, Cohen R, Garcia-Santiago O, Nguyen P. Community mobilization  
572 and its application to youth violence prevention. *American Journal of Preventive Medicine*.  
573 2008;34(3):S5-S12.
- 574 21. Brunton G, Caird J, Stokes G, Stansfield C, Kneale D, Richardson M, et al. Review 1:  
575 Community engagement for health via coalitions, collaborations and partnerships: a  
576 systematic review. 2015.
- 577 22. Holder HD, Gruenewald PJ, Ponicki WR, Treno AJ, Grube JW, Saltz RF, et al. Effect of  
578 community-based interventions on high-risk drinking and alcohol-related injuries. *Jama*.  
579 2000;284(18):2341-7.
- 580 23. Shults RA, Elder RW, Nichols JL, Sleet DA, Compton R, Chattopadhyay SK, et al.  
581 Effectiveness of multicomponent programs with community mobilization for reducing  
582 alcohol-impaired driving. *American journal of preventive medicine*. 2009;37(4):360-71.
- 583 24. Massetti GM. Preventing violence among high-risk youth and communities with  
584 economic, policy, and structural strategies. *MMWR supplements*. 2016;65.
- 585 25. Trickett EJ, Beehler S. The ecology of multilevel interventions to reduce social  
586 inequalities in health. *American Behavioral Scientist*. 2013;57(8):1227-46.
- 587 26. Durand M-A, Carpenter L, Dolan H, Bravo P, Mann M, Bunn F, et al. Do interventions  
588 designed to support shared decision-making reduce health inequalities? A systematic review  
589 and meta-analysis. *PloS one*. 2014;9(4):e94670.
- 590 27. Nickel S, von dem Knesebeck O. Do multiple community-based interventions on  
591 health promotion tackle health inequalities? *International Journal for Equity in Health*.  
592 2020;19(1):1-13.
- 593 28. Adhikari B, Vincent R, Wong G, Duddy C, Richardson E, Lavery JV, et al. A realist  
594 review of community engagement with health research. *Wellcome open research*. 2019;4.
- 595 29. Wandersman A, Florin P. Community interventions and effective prevention.  
596 *American Psychologist*. 2003;58(6-7):441.
- 597 30. Gabriel RM. Methodological challenges in evaluating community partnerships &  
598 coalitions: Still crazy after all these years. *Journal of Community Psychology*.  
599 2000;28(3):339-52.

- 600 31. Bonell C, Hargreaves J, Strange V, Pronyk P, Porter J. Should structural interventions  
601 be evaluated using RCTs? The case of HIV prevention. *Social Science & Medicine*.  
602 2006;63(5):1135-42.
- 603 32. Jagosh J. Realist synthesis for public health: building an ontologically deep  
604 understanding of how programs work, for whom, and in which contexts. *Annual Review of*  
605 *Public Health*. 2019.
- 606 33. Usher AM, McShane KE, Dwyer C. A realist review of family-based interventions for  
607 children of substance abusing parents. *Systematic Reviews*. 2015;4(1):1-12.
- 608 34. Richardson EZL, Bandewar SVS, Boulanger RF, Mehta R, Lin T, Vincent R, et al.  
609 Addressing diversity and complexity in the community engagement literature: The rationale  
610 for a realist review. *Wellcome Open Research*. 2020;5(1):1.
- 611 35. Wong G, Pawson R, Owen L. Policy guidance on threats to legislative interventions in  
612 public health: a realist synthesis. *BMC Public Health*. 2011;11(1):222.
- 613 36. Jagosh J, Macaulay AC, Pluye P, Salsberg J, Bush PL, Henderson JIM, et al. Uncovering  
614 the benefits of participatory research: implications of a realist review for health research  
615 and practice. *The Milbank Quarterly*. 2012;90(2):311-46.
- 616 37. Cooper C, Lhussier M, Shucksmith J, Carr SM. Protocol for a realist review of complex  
617 interventions to prevent adolescents from engaging in multiple risk behaviours. *BMJ open*.  
618 2017;7(9):e015477.
- 619 38. Power J, Gilmore B, Vallières F, Toomey E, Mannan H, McAuliffe E. Adapting health  
620 interventions for local fit when scaling-up: a realist review protocol. *BMJ Open*. 2019;9(1).
- 621 39. Pawson R, Greenhalgh T, Harvey G, Walshe K. Realist review-a new method of  
622 systematic review designed for complex policy interventions. *Journal of Health Services*  
623 *Research & Policy*. 2005;10(1\_suppl):21-34.
- 624 40. Greenhalgh T, Wong G, Westhorp G, Pawson R. Protocol-realist and meta-narrative  
625 evidence synthesis: evolving standards (RAMESES). *BMC Medical Research Methodology*.  
626 2011;11(1):115.
- 627 41. Wong G, Greenhalgh T, Westhorp G, Pawson R. Development of methodological  
628 guidance, publication standards and training materials for realist and meta-narrative  
629 reviews: the RAMESES (Realist And Meta-narrative Evidence Syntheses–Evolving Standards)  
630 project. 2014.
- 631 42. Booth A, Briscoe S, Wright JM. The “realist search”: A systematic scoping review of  
632 current practice and reporting. *Research Synthesis Methods*. 2020;11(1):14-35.
- 633 43. Weetman K, Wong G, Scott E, Schnurr S, Dale J. Improving best practice for patients  
634 receiving hospital discharge letters: a realist review protocol. *BMJ Open*.  
635 2017;7(11):e018353.
- 636 44. Dalkin SM, Greenhalgh J, Jones D, Cunningham B, Lhussier M. What’s in a  
637 mechanism? Development of a key concept in realist evaluation. *Implementation Science*.  
638 2015;10(1):1-7.
- 639 45. Abrams R, Wong G, Mahtani KR, Tierney S, Boylan A-M, Roberts N, et al.  
640 Understanding the impact of delegated home visiting services accessed via general practice  
641 by community-dwelling patients: a realist review protocol. *BMJ Open*. 2018;8(11).
- 642 46. GRADE Working Group. Grading of Recommendations, Assessment, Development,  
643 and Evaluation. Available from: <https://www.gradeworkinggroup.org/>.
- 644 47. Pawson R. Digging for nuggets: how ‘bad’ research can yield ‘good’ evidence.  
645 *International Journal of Social Research Methodology*. 2006;9(2):127-42.

- 646 48. Jagosh J, Bush PL, Salsberg J, Macaulay AC, Greenhalgh T, Wong G, et al. A realist  
647 evaluation of community-based participatory research: partnership synergy, trust building  
648 and related ripple effects. BMC Public Health. 2015;15(1):725.  
649
